# Supplementary material for: Quantitative PCR Analysis of DNA Aptamer Pharmacokinetics in Mice
Source: PubMed Central journal article supplement — Nucleic Acid Ther. 2015 Feb 1;25(1):11–9. doi: 10.1089/nat.2014.0515 (PMC4296750; doi:10.1089/nat.2014.0515), 2015-02-01
Supplement: Supp_Data.pdf [file Supp_Data.pdf]

# Supplemental Materials

## Quantitative PCR analysis of DNA aptamer pharmacokinetics in mice

Katherine Perschbacher<sup>1,3</sup>, John A. Smestad<sup>1,3</sup>, Justin P. Peters<sup>1</sup>,  
Miranda M. Standiford<sup>1</sup>, Aleksandar Denic<sup>2</sup>, Bharath Wootla<sup>2</sup>,  
Arthur E. Warrington<sup>2</sup>, Moses Rodriguez<sup>2</sup>, and L. James Maher, III<sup>1,4</sup>

<sup>1</sup>Department of Biochemistry and Molecular Biology

<sup>2</sup>Departments of Neurology and Immunology

Mayo Clinic College of Medicine

200 First St. SW

Rochester, MN 55905, USA

<sup>3</sup>Joint first authors

<sup>4</sup>To whom correspondence should be addressed at maher@mayo.edu

# Quantitative PCR

Figure S1: Quantitative PCR assay demonstrating differential amplification of serial dilutions of 3064 aptamer solutions, using a SYBR Green detection system. (Top) Normalized fluorescence data are fit to the sigmoid model given in Equation 1 of Online Methods. (Bottom) The fitted  $C_{1/2}$  parameter is plotted as a function of 3064 aptamer concentration. Linear regression gives  $R^2 \sim 1$ .

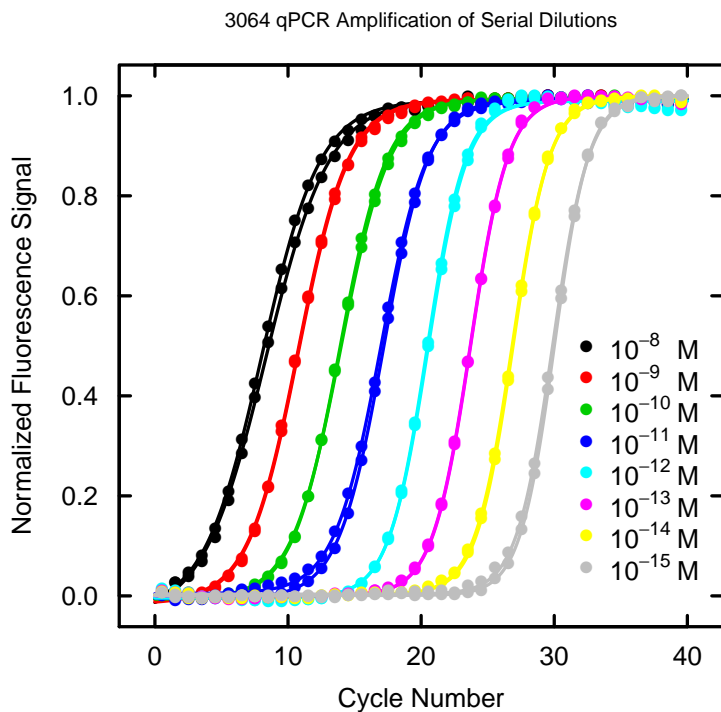

Logarithmic Dependence of  $C_{1/2}$  Parameter On Initial Aptamer Concentration

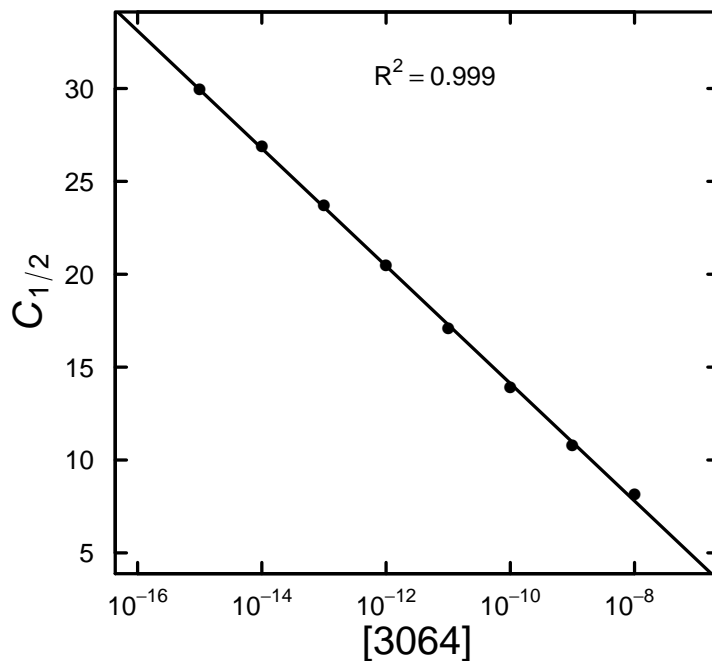

From standard curves like the one shown in Figure S1, each  $C_{1/2}$  value of the tissue samples is converted into an aptamer concentration using the slope and intercept determined from linear regression. These concentrations are then converted into molecules (using Avogadro’s number and the mass of the bare aptamer). Finally, each concentration was divided by 5 mg of tissue (the amount used to seed the qPCR reaction) to arrive at a normalized concentration value. Grubbs test was then performed to determine if any of the 3–7 values represented an outlier, which was removed from the data. The final normalized concentrations (molecules/mg tissue) for each mouse for each tissue at each time point are given in Tables S1–S5. It should be emphasized that at most two digits are significant in the tables that follow, but integer concentrations are shown to allow for computation of means and standard deviations. The mean (and standard deviation) values were used to construct Figures 2–4 of the main text and for pharmacokinetic modeling.

Table S1: 3064BS concentration (molecules/mg tissue)

| Tissue      | 10 minutes | 30 minutes | 1 hour     | 4 hours    | 24 hours | 48 hours |
|-------------|------------|------------|------------|------------|----------|----------|
| Liver       | 690628138  | 41570819   | 1824344639 | 1033807162 | 511732   | 24966    |
|             | 1146055316 | 4068976122 | 5142076435 | 2051089985 | 10231810 | 64774    |
|             | 1554518131 | 4626052364 | 8685232092 | 2902431497 | 19450853 | 203476   |
|             | 1766135626 | 7026483427 |            | 7786512704 | 37147797 | 253926   |
| Spleen      | 1212328685 | 892283924  | 2229615531 | 483437053  | 399201   | 36087    |
|             | 2199327699 | 2237994690 | 2281263647 | 564122240  | 19853732 | 70014    |
|             | 4206610455 | 3762435933 | 3527974975 | 1729108497 | 21812908 | 362566   |
|             | 5401333247 | 4507666819 | 6709622832 | 2310706313 | 69198017 | 1312337  |
| Kidney      |            | 8173240404 |            |            |          |          |
|             | 401171766  | 43307015   | 2709840    | 5015137    | 1084995  | 1870     |
|             | 527015476  | 75934220   | 9694939    | 8194079    | 1128906  | 31865    |
|             | 1198596615 | 80755742   | 46101564   | 9485021    |          | 89004    |
| Blood       | 1818182076 | 104723782  | 94702740   |            |          |          |
|             | 2184375    | 192505002  | 65966831   | 5145631    | 316291   | 27584    |
|             | 28660172   | 352268556  | 65970900   | 9534839    | 711058   | 33055    |
|             | 71408720   | 836840590  |            | 13617897   | 1066339  | 57147    |
| Spinal Cord | 74110545   | 930682884  |            | 28292487   |          | 109298   |
|             |            | 1095303394 |            |            |          |          |
|             | 340701     | 1459900    | 857423     | 22587      | 8996     | 3080     |
|             | 5356673    | 1464795    | 2037693    | 758404     | 19333    | 4054     |
| Brain       | 6424052    | 3860913    | 2834898    | 2919474    | 47239    | 4708     |
|             | 11274681   | 4477161    |            | 2979932    | 150198   |          |
|             | 24732562   | 6955629    |            |            |          |          |
|             | 270969     | 500531     | 670825     | 150988     | 22780    | 100884   |
| Brain       | 358839     | 5151538    | 766317     | 391954     | 79642    | 102554   |
|             | 752104     | 15432151   | 2066911    | 846104     | 207984   |          |
|             | 3787195    | 16057374   |            | 1399433    | 259766   |          |
|             | 7739085    |            |            |            |          |          |

Table S2: 3064B concentration

| Tissue      | 10 minutes  | 4 hours | 24 hours |
|-------------|-------------|---------|----------|
| Liver       | 5526294423  | 601172  | 9009     |
|             | 9245183153  | 618763  | 11035    |
|             | 13604781859 | 901946  | 20835    |
|             | 17545692587 | 916161  |          |
| Spleen      | 4906802752  | 71496   | 90056    |
|             | 8057113780  | 1085463 | 179203   |
|             | 9231517482  | 1497768 | 267677   |
| Kidney      | 12999248607 | 4578226 | 629207   |
|             | 73010802    | 283307  | 209826   |
|             | 76721026    | 404280  | 243634   |
| Kidney      | 89337776    | 494650  | 320409   |
|             |             | 859376  | 574493   |
|             |             |         |          |
| Blood       | 53755724    | 3240    | 4581     |
|             | 89570070    | 9258    | 4963     |
|             | 218503670   | 14135   | 6761     |
|             | 337785142   | 18016   |          |
| Spinal Cord | 8502546     | 19359   | 3636     |
|             | 12452931    | 24800   | 3814     |
|             | 14650901    | 31909   | 4502     |
|             | 31391261    |         |          |
| Brain       | 6003064     | 7958    | 5120     |
|             | 9012206     | 9744    | 8324     |
|             | 21518483    | 16639   | 15117    |
|             |             | 21194   |          |

Table S3: 3064 concentration

| Tissue      | 10 minutes | 4 hours   | 24 hours |
|-------------|------------|-----------|----------|
| Liver       | 500028     | 13016380  | 5588     |
|             | 1860294    | 17277228  | 14672    |
|             | 835191796  | 95811725  | 25111    |
|             | 1418827027 | 230945599 | 26174    |
|             |            | 70724     |          |
|             |            | 132156    |          |
|             |            | 140434    |          |
| Spleen      | 840980     | 29354873  | 8726     |
|             | 9031257    | 36404026  | 29883    |
|             | 81492377   | 51343851  | 96262    |
|             |            | 82475410  | 229258   |
|             |            | 241069    |          |
|             |            | 337458    |          |
|             |            | 351407    |          |
| Kidney      | 321033     | 2260840   | 7        |
|             | 586228     | 13223183  | 414      |
|             | 191469570  | 24885292  | 6185     |
|             | 849041755  | 25237522  | 85202    |
|             |            | 287579    |          |
|             |            | 301458    |          |
|             |            | 441976    |          |
| Blood       | 14591      | 155325    | 17       |
|             | 411133     | 583291    | 19       |
|             | 15826802   | 809136    | 52       |
|             | 60608603   |           | 72       |
|             |            | 658       |          |
|             |            | 691       |          |
|             |            | 1021      |          |
| Spinal Cord | 133347     | 47317     | 52       |
|             | 261683     | 95161     | 81       |
|             | 684845     | 123438    | 1435     |
|             |            | 231652    | 2612     |
|             |            | 3037      |          |
|             |            | 3278      |          |
|             |            | 4124      |          |
| Brain       | 20462      | 3083      | 115      |
|             | 137257     | 12963     | 174      |
|             | 195476     | 21690     | 277      |
|             | 256693     | 33589     | 280      |
|             |            | 280       |          |
|             |            | 392       |          |

Table S4: 3064BS (TMEV) concentration

| Tissue      | 10 minutes | 30 minutes | 1 hour     | 4 hours  | 24 hours | 48 hours |
|-------------|------------|------------|------------|----------|----------|----------|
| Liver       | 30180457   | 128327904  | 1577180    | 64269    | 1978     | 6779     |
|             | 143152668  | 249170727  | 3958304    | 393927   | 5604     | 13161    |
|             | 319215107  | 281230428  | 37189992   |          | 13315    | 31873    |
|             | 324270676  | 287612768  | 130795353  |          | 50554    | 70142    |
|             | 615311718  | 498737082  | 258937468  |          | 75611    | 168923   |
|             |            | 537379346  |            | 116301   |          |          |
| Spleen      | 690112261  | 105234621  | 2249359    | 344328   | 5905     | 4317     |
|             | 1286055641 | 604670795  | 18052178   | 2233540  | 27732    | 7962     |
|             | 2019297032 | 1439433418 | 74800324   |          | 66551    | 10992    |
|             | 3009659987 | 1932352957 | 232183404  |          | 115988   | 17933    |
|             |            | 3862770412 | 462833319  |          | 420640   |          |
|             |            |            |            | 918311   |          |          |
|             |            |            |            | 935614   |          |          |
| Kidney      | 303706194  | 672304841  | 311608586  | 2731097  | 55963    | 32055    |
|             | 431702318  | 791395771  | 1828795185 | 17910736 | 582517   | 61359    |
|             | 844887259  | 856007940  | 2788185147 |          | 729991   | 176021   |
|             | 944756477  | 948309688  | 3110318185 |          | 2618305  | 224867   |
|             |            |            | 5949598400 |          | 6056249  | 260725   |
|             |            | 7969560154 |            | 6746747  |          |          |
| Blood       | 12550      | 201601     | 6884235    | 1140323  | 1549     | 36718    |
|             | 26232      | 7417344    | 9763460    | 3930438  | 25680    | 66501    |
|             | 36993      | 247990271  | 12765757   |          | 45574    | 219490   |
|             | 46639      | 345160283  |            |          | 83290    | 294678   |
|             |            | 448318729  |            |          | 166583   |          |
|             |            |            |            | 171505   |          |          |
| Spinal Cord | 5779813    | 12770006   | 308        | 65658    | 7        | 6        |
|             | 10552411   | 39807602   | 344        | 72037    | 7        | 6        |
|             | 25256133   | 75936763   | 22076      |          | 15       | 7        |
|             | 31233328   | 76503806   | 265166     |          | 88       |          |
|             |            | 99024280   | 1800817    |          | 428      |          |
|             |            | 3180227    |            | 916      |          |          |
|             |            |            |            | 1145     |          |          |
| Brain       | 59185116   | 57410561   | 507187     | 226241   | 35473    | 7044     |
|             | 74693792   | 110588692  | 1865396    | 756760   | 56194    | 13066    |
|             | 152302349  | 238584050  | 5565396    | 6749846  | 84603    | 24097    |
|             | 317930804  | 424235500  | 14212202   |          | 98941    | 43727    |
|             |            |            | 32932611   |          | 148878   | 99186    |
|             |            | 62195610   |            | 339324   |          |          |
|             |            |            |            | 471919   |          |          |

Table S5: 4971 concentration

| Tissue      | 10 minutes | 4 hours | 24 hours |
|-------------|------------|---------|----------|
| Liver       | 888852     | 1249    | 41       |
|             | 1070017    | 3532    | 73       |
|             | 1094008    | 3575    | 173      |
| Spleen      |            | 4690    | 222      |
|             | 876221     | 479     | 276      |
|             | 899544     | 560     | 362      |
|             |            | 878     | 375      |
| Kidney      |            | 1031    | 449      |
|             | 429605     | 2501    | 438      |
|             | 876334     | 2978    | 515      |
|             | 1438972    | 3988    | 541      |
| Blood       |            | 4371    | 645      |
|             | 1141       | 2996    | 3336     |
|             | 5115       | 3105    | 3385     |
|             | 12106      | 3295    |          |
| Spinal Cord | 12687      | 4042    |          |
|             | 1          | 1       | 1        |
|             | 275        | 1       | 1        |
|             |            | 1       | 1        |
| Brain       |            | 7       | 9        |
|             | 1085       | 52      | 1        |
|             | 1962       | 141     | 1        |
|             | 77537      | 169     | 2        |
|             | 80233      | 283     |          |

## Pharmacokinetic modeling

### The gamma variate function

Consider a probability density function of the form

$$f(t) = \frac{1}{\beta^{\alpha+1}\Gamma(\alpha+1)} t^{\alpha} e^{-\frac{t}{\beta}} = \frac{C(t)}{A(\infty)} \quad (\text{S1})$$

where  $\alpha$  and  $\beta$  are parameters describing the function and  $\Gamma(n)$  is the gamma function given by

$$\Gamma(n) = \int_0^{\infty} x^{n-1} e^{-x} dx \quad (\text{S2})$$

This density function is equivalent to a concentration-time curve,  $C(t)$ , in which each time point is divided by the total area under the concentration-time curve,  $A(\infty)$ , thus transforming each input into a probability measure. Making the substitution

$$\kappa = \frac{A(\infty)}{\beta^{\alpha+1}\Gamma(\alpha+1)} \quad (\text{S3})$$

the concentration-time curve becomes

$$C(t) = \kappa t^{\alpha} e^{-\frac{t}{\beta}} \quad (\text{S4})$$

The area under this concentration-time curve (up to time  $T$ ) is

$$A(T) = \int_0^T C(t) dt \quad (\text{S5})$$

and with the substitutions  $t = \beta x$ ,  $dt = \beta dx$ , and  $\alpha = n - 1$  it follows that

$$\begin{aligned} A(T) &= \int_0^T \kappa t^\alpha e^{-\frac{t}{\beta}} dt = \int_0^T \kappa (\beta x)^{n-1} e^{-x} \beta dx \\ &= \kappa \beta^n \int_0^T x^{n-1} e^{-x} dx \\ &= \kappa \beta^n \gamma(n, T) \quad = \kappa \beta^{\alpha+1} \gamma(\alpha + 1, T) \end{aligned} \quad (\text{S6})$$

where  $\gamma(n, T)$  is the lower incomplete gamma function

$$\gamma(n, T) = \int_0^T x^{n-1} e^{-x} dx = \Gamma(n) \cdot P(n, T) \quad (\text{S7})$$

which is equal to the product of the gamma function and the gamma distribution function  $P(n, T)$  given by

$$P(n, T) = \frac{1}{\Gamma(n)} \int_0^T x^{n-1} e^{-x} dx \quad (\text{S8})$$

As  $T \rightarrow \infty$ , it follows that  $\gamma(n, T) \rightarrow \Gamma(n)$  and the equivalence between Equation S6 at infinite  $T$  and Equation S3 becomes clear. Because integration of  $C(t)$  (from 0 to  $\infty$ ) produces a gamma function, this concentration function is known as a gamma variate.

To facilitate interpretation of the parameters  $\alpha$ ,  $\beta$ , and  $\gamma$ , we rearrange the gamma variate function as follows. First, we make the substitution

$$k = \kappa \beta^\alpha \quad (\text{S9})$$

resulting in

$$C(t) = k \left( \frac{t}{\beta} \right)^\alpha e^{-\frac{t}{\beta}} \quad (\text{S10})$$

The parameter  $k$  has units of concentration (and is related to concentration maximum),  $\beta$  has units of time, and  $\alpha$  is dimensionless. Next, we make the substitutions  $\alpha = \ln 2/a$  and  $\beta = b/\ln 2$  so that  $C(t)$  has final form

$$C(t) = k \left( \frac{\ln 2}{b} t \right)^{\frac{\ln 2}{a}} e^{-\frac{\ln 2}{b} t} \quad (\text{S11})$$

In this form, the parameter  $b$  represents an effective half-life. Finally, we make substitutions in Equation S6, resulting in the following final form of  $A(T)$

$$A(T) = k_1 \left( \frac{b_1}{\ln 2} \right) \gamma \left( \frac{\ln 2}{a_1} + 1, T \right) + k_2 \left( \frac{b_2}{\ln 2} \right) \gamma \left( \frac{\ln 2}{a_2} + 1, T \right) \quad (\text{S12})$$

### Sum of two gamma variates

Shown in Figure S2, the experimental data sets are modeled as the sum of two gamma variates

$$C(t) = \sum_{i=1}^2 C_i(t) = \sum_{i=1}^2 k_i \left( \frac{\ln 2}{b_i} t \right)^{\frac{\ln 2}{a_i}} e^{-\frac{\ln 2}{b_i} t} \quad (\text{S13})$$

Figure S2: Schematic illustration of pharmacokinetic data modeled as the sum of two gamma variates. An example fitting curve expresses recovered aptamer concentration (molecules per mg extracted tissue) on a logarithmic scale as a function of time (in hours) after i.p. injection. Data are well fit by the sum (gray) of two gamma variates (red and blue) describing an initial rapid aptamer accumulation and partial depletion phase, followed by a slow first-order exponential decay phase.

$$C(t) = k_1 \left( \frac{\ln 2}{b_1} t \right)^{\frac{\ln 2}{a_1}} e^{-\frac{\ln 2}{b_1} t} + k_2 \left( \frac{\ln 2}{b_2} t \right)^{\frac{\ln 2}{a_2}} e^{-\frac{\ln 2}{b_2} t}$$

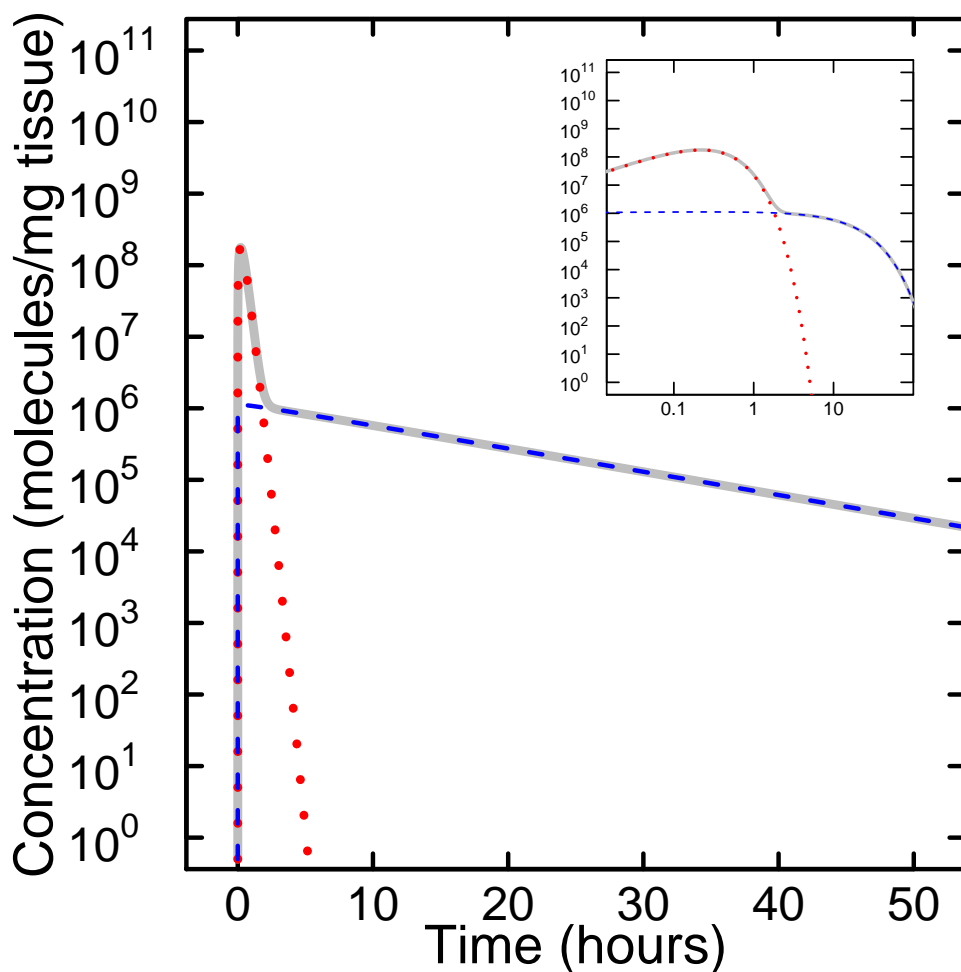



## Optimization

A weighted nonlinear least squares method was used to minimize the cost function  $Q(\mathbf{p})$  with respect to the free parameters  $\mathbf{p} = (k_1, k_2, a_1, a_2, b_1, b_2)$

$$\chi^2 = \min_{\mathbf{p}} Q(\mathbf{p}) = \min_{\mathbf{p}} \sum_{m=1}^M \left( \frac{\bar{C}_m - C(t_m; \mathbf{p})}{\sigma_{\bar{C}_m}} \right)^2 \quad (\text{S14})$$

where  $M$  is the number of time points being fit,  $t_m$  are times in minutes (corresponding to the  $m$ -th time point),  $\bar{C}_m$  are experimentally determined mean concentrations,  $\sigma_{\bar{C}_m}$  are standard deviations of  $\bar{C}_m$ , and  $C(t_m; \mathbf{p})$  are theoretical predictions of the model. Optimizations were performed using a simplex and inductive search hybrid algorithm (SIH).

## Monte Carlo estimation of uncertainty

Simulated data sets were generated from the experimental data by adding Gaussian noise, i.e. randomly sampling from the normal distributions  $N_m(\mu = \bar{C}_m, \sigma = \sigma_{\bar{C}_m})$ . These simulated data sets ( $N_m^\epsilon$  for  $\epsilon = 1, \dots, \epsilon_{\max}$ ) were fitted with the pharmacokinetic model to determine  $\mathbf{p}_{\min}^\epsilon$

$$\min_{\mathbf{p}^\epsilon} \sum_{m=1}^M \left( \frac{N_m^\epsilon - C(t_m; \mathbf{p}^\epsilon)}{\sigma_{N_m^\epsilon}} \right)^2 \quad (\text{S15})$$

For a given parameter  $p_k$ , the median was taken and the standard deviation was estimated as

$$\sigma_{p_k} = \sqrt{\frac{1}{\epsilon_{\max} - 1} \sum_{\epsilon=1}^{\epsilon_{\max}} \left( p_{\min, k}^\epsilon - \bar{p}_k \right)^2} \quad (\text{S16})$$

where  $\epsilon_{\max}$  was set at 10,000 and  $\bar{p}_k$  is the mean value

$$\bar{p}_k = \frac{1}{\epsilon_{\max}} \sum_{\epsilon=1}^{\epsilon_{\max}} p_{\min, k}^\epsilon \quad (\text{S17})$$

Additionally, the relative bias in the parameter  $p_k$  is given by

$$B_k = \frac{|p_{\min, k} - \bar{p}_k|}{p_{\min, k}} \quad (\text{S18})$$

The median relative bias of all parameter estimates was  $\sim 3$  percent, giving confidence in the method.

## Parameters from concentration-time curves

Figure S3: Parameters from fitting concentration data with pharmacokinetic model. Values of  $k_1$ ,  $k_2$ ,  $a_1$ ,  $a_2$ ,  $b_1$ , and  $b_2$  determined from fitting are given in Table 1 of the main text.

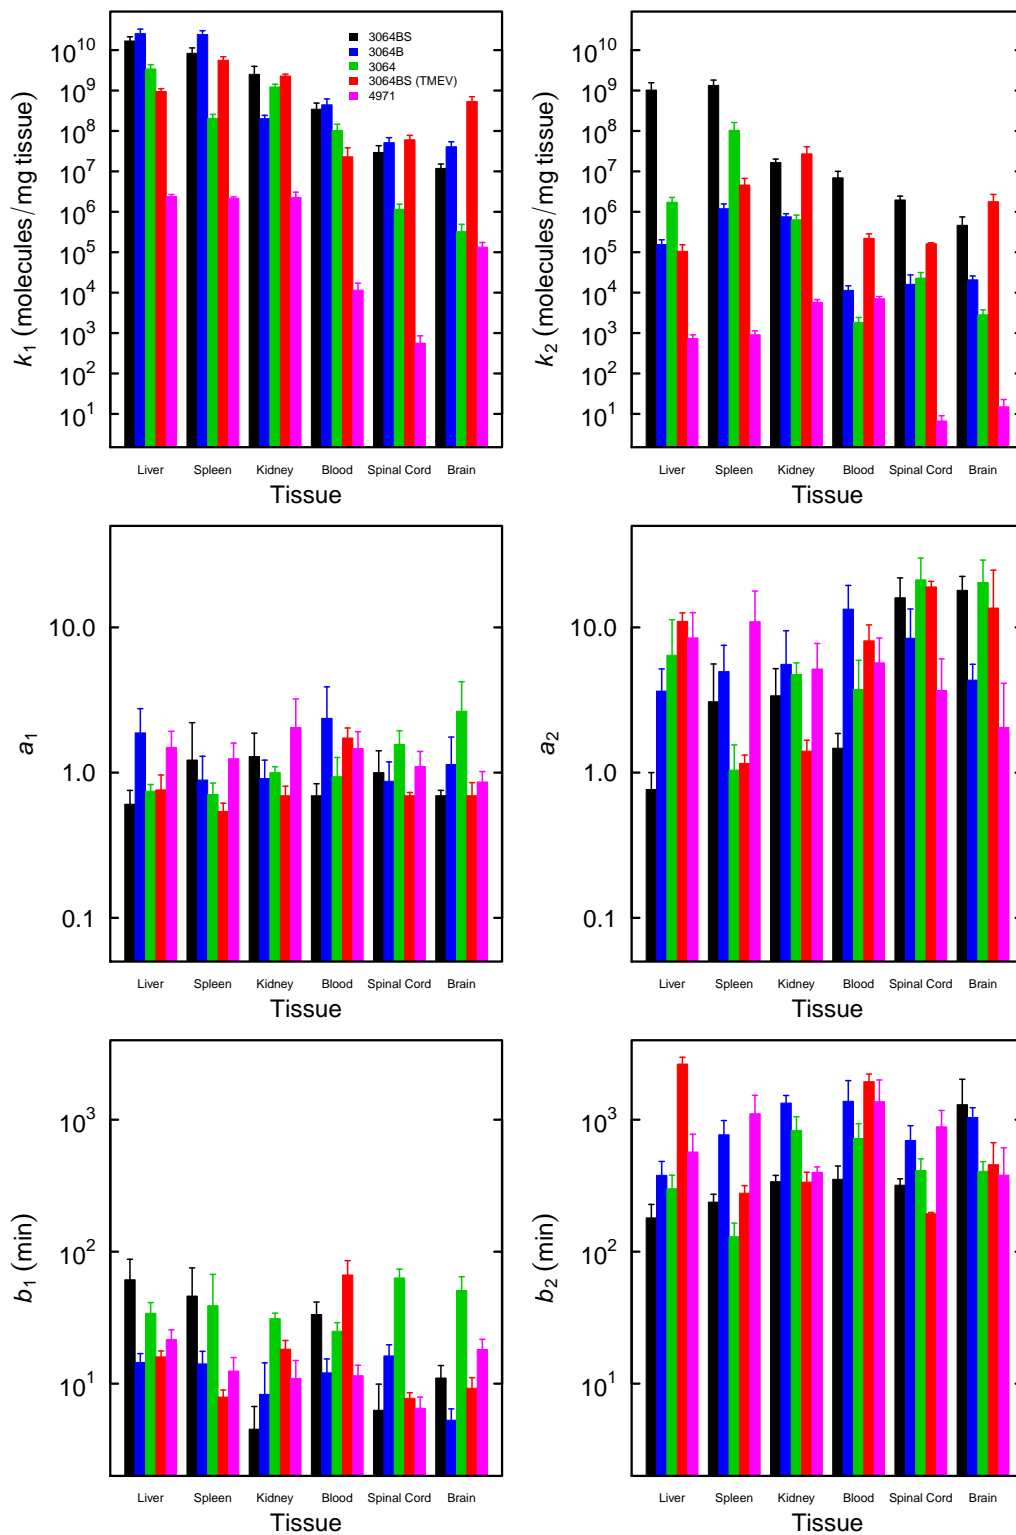

Two additional parameters of interest are time to peak ( $t_p$ )

$$t_{p_i} = \alpha_i \beta_i = \frac{b_i}{a_i} \quad (\text{S19})$$

and peak concentration ( $C_p$ ) achieved at  $t_p$

$$C_{p_i} = k_i \left( \frac{\alpha_i}{e} \right)^{\alpha_i} = k_i \left( \frac{\ln 2}{a_i e} \right)^{\frac{\ln 2}{a_i}} \quad (\text{S20})$$

Since the pharmacokinetic model is a sum of two gamma variates, the observed  $t_p$  occurs near but not precisely at  $t_{p1}$ . Likewise, the observed  $C_p$  reflects the sum of  $C_{p1}$  plus the value of  $C_2$  evaluated at the observed  $t_p$ . However, as shown in Table S6, in most cases this contribution is negligible as  $t_p \approx t_{p1}$  and  $C_p \approx C_{p1}$ .

Figure S4: The observed  $t_p$  and observed  $C_p$  from pharmacokinetic modeling.

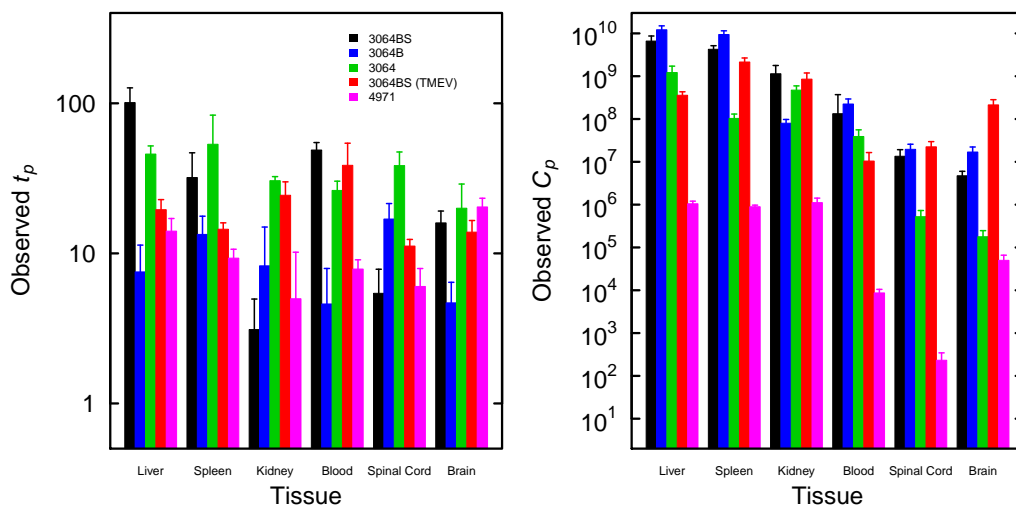

Table S6: Values of  $t_{p_i}$ ,  $C_{p_i}$ , and the observed  $t_p$  and observed  $C_p$  from the pharmacokinetic model

| Tissue      | $t_{p1}$<br>(min) | $C_{p1}$<br>(molecules/mg tissue) | $t_{p2}$<br>(min) | $C_{p2}$<br>(molecules/mg tissue) | observed $t_p$<br>(min) | observed $C_p$<br>(molecules/mg tissue) |
|-------------|-------------------|-----------------------------------|-------------------|-----------------------------------|-------------------------|-----------------------------------------|
|             | 3064BS            |                                   |                   |                                   |                         |                                         |
| Liver       | 100 ± 30          | 6.4 ± 1.7 × 10 <sup>9</sup>       | 240 ± 20          | 3.8 ± 1.9 × 10 <sup>8</sup>       | 100 ± 30                | 6.6 ± 2.1 × 10 <sup>9</sup>             |
| Spleen      | 32 ± 15           | 3.6 ± 1.0 × 10 <sup>9</sup>       | 75 ± 66           | 7.2 ± 3.2 × 10 <sup>8</sup>       | 32 ± 15                 | 4.3 ± 0.9 × 10 <sup>9</sup>             |
| Kidney      | 3.1 ± 1.8         | 1.1 ± 0.6 × 10 <sup>9</sup>       | 100 ± 60          | 9.4 ± 2.0 × 10 <sup>6</sup>       | 3.1 ± 1.9               | 1.1 ± 0.6 × 10 <sup>9</sup>             |
| Blood       | 49 ± 6            | 1.3 ± 2.4 × 10 <sup>8</sup>       | 240 ± 0           | 2.8 ± 1.2 × 10 <sup>6</sup>       | 49 ± 6                  | 1.3 ± 2.4 × 10 <sup>8</sup>             |
| Spinal Cord | 5.4 ± 2.4         | 1.2 ± 0.6 × 10 <sup>7</sup>       | 23 ± 44           | 1.4 ± 0.4 × 10 <sup>6</sup>       | 5.4 ± 2.4               | 1.3 ± 0.6 × 10 <sup>7</sup>             |
| Brain       | 16 ± 3            | 4.4 ± 1.2 × 10 <sup>6</sup>       | 87 ± 57           | 3.8 ± 1.9 × 10 <sup>5</sup>       | 16 ± 3                  | 4.7 ± 1.3 × 10 <sup>6</sup>             |
|             | 3064B             |                                   |                   |                                   |                         |                                         |
| Liver       | 7.5 ± 3.8         | 1.2 ± 0.3 × 10 <sup>10</sup>      | 110 ± 30          | 9.0 ± 2.8 × 10 <sup>4</sup>       | 7.5 ± 3.8               | 1.2 ± 0.3 × 10 <sup>10</sup>            |
| Spleen      | 13 ± 4            | 9.4 ± 1.8 × 10 <sup>9</sup>       | 150 ± 50          | 7.9 ± 2.4 × 10 <sup>5</sup>       | 13 ± 4                  | 9.4 ± 2.1 × 10 <sup>9</sup>             |
| Kidney      | 8.3 ± 6.7         | 7.9 ± 1.6 × 10 <sup>7</sup>       | 240 ± 70          | 5.4 ± 1.1 × 10 <sup>5</sup>       | 8.3 ± 6.7               | 8.0 ± 1.8 × 10 <sup>7</sup>             |
| Blood       | 4.6 ± 3.3         | 2.2 ± 0.7 × 10 <sup>8</sup>       | 100 ± 60          | 9.3 ± 2.6 × 10 <sup>3</sup>       | 4.6 ± 3.3               | 2.2 ± 0.7 × 10 <sup>8</sup>             |
| Spinal Cord | 17 ± 5            | 2.0 ± 0.6 × 10 <sup>7</sup>       | 84 ± 44           | 1.2 ± 0.6 × 10 <sup>4</sup>       | 17 ± 5                  | 2.0 ± 0.6 × 10 <sup>7</sup>             |
| Brain       | 4.7 ± 1.7         | 1.7 ± 0.5 × 10 <sup>7</sup>       | 240 ± 20          | 1.3 ± 0.3 × 10 <sup>4</sup>       | 4.7 ± 1.7               | 1.7 ± 0.5 × 10 <sup>7</sup>             |
|             | 3064              |                                   |                   |                                   |                         |                                         |
| Liver       | 46 ± 6            | 1.3 ± 0.3 × 10 <sup>9</sup>       | 47 ± 56           | 1.3 ± 0.4 × 10 <sup>6</sup>       | 46 ± 6                  | 1.2 ± 0.5 × 10 <sup>9</sup>             |
| Spleen      | 53 ± 30           | 7.7 ± 2.1 × 10 <sup>7</sup>       | 120 ± 30          | 4.0 ± 2.1 × 10 <sup>7</sup>       | 53 ± 30                 | 1.0 ± 0.3 × 10 <sup>8</sup>             |
| Kidney      | 30 ± 2            | 4.7 ± 0.8 × 10 <sup>8</sup>       | 220 ± 30          | 4.1 ± 1.0 × 10 <sup>5</sup>       | 31 ± 2                  | 4.7 ± 1.2 × 10 <sup>8</sup>             |
| Blood       | 26 ± 4            | 4.0 ± 1.5 × 10 <sup>7</sup>       | 180 ± 40          | 1.1 ± 0.3 × 10 <sup>3</sup>       | 26 ± 4                  | 3.9 ± 1.7 × 10 <sup>7</sup>             |
| Spinal Cord | 39 ± 9            | 5.2 ± 1.6 × 10 <sup>5</sup>       | 23 ± 65           | 1.8 ± 0.8 × 10 <sup>4</sup>       | 38 ± 9                  | 5.2 ± 2.1 × 10 <sup>5</sup>             |
| Brain       | 20 ± 9            | 1.8 ± 0.6 × 10 <sup>5</sup>       | 20 ± 24           | 2.3 ± 0.8 × 10 <sup>3</sup>       | 20 ± 9                  | 1.8 ± 0.7 × 10 <sup>5</sup>             |
|             | 3064BS (TMEV)     |                                   |                   |                                   |                         |                                         |
| Liver       | 20 ± 3            | 3.6 ± 0.6 × 10 <sup>8</sup>       | 240 ± 10          | 8.3 ± 2.6 × 10 <sup>4</sup>       | 20 ± 3                  | 3.6 ± 0.7 × 10 <sup>8</sup>             |
| Spleen      | 14 ± 1            | 2.2 ± 0.5 × 10 <sup>9</sup>       | 240 ± 0           | 1.9 ± 0.8 × 10 <sup>6</sup>       | 14 ± 1                  | 2.1 ± 0.5 × 10 <sup>9</sup>             |
| Kidney      | 24 ± 6            | 8.5 ± 3.2 × 10 <sup>8</sup>       | 240 ± 10          | 1.2 ± 0.5 × 10 <sup>7</sup>       | 24 ± 6                  | 8.5 ± 3.4 × 10 <sup>8</sup>             |
| Blood       | 39 ± 16           | 1.1 ± 0.5 × 10 <sup>7</sup>       | 240 ± 20          | 1.6 ± 0.5 × 10 <sup>5</sup>       | 39 ± 16                 | 1.0 ± 0.6 × 10 <sup>7</sup>             |
| Spinal Cord | 11 ± 1            | 2.2 ± 0.7 × 10 <sup>7</sup>       | 10 ± 15           | 1.4 ± 0.1 × 10 <sup>5</sup>       | 11 ± 1                  | 2.2 ± 0.7 × 10 <sup>7</sup>             |
| Brain       | 14 ± 3            | 2.1 ± 0.7 × 10 <sup>8</sup>       | 38 ± 76           | 1.1 ± 0.7 × 10 <sup>6</sup>       | 14 ± 3                  | 2.1 ± 0.7 × 10 <sup>8</sup>             |
|             | 4971              |                                   |                   |                                   |                         |                                         |
| Liver       | 14 ± 3            | 1.0 ± 0.1 × 10 <sup>6</sup>       | 70 ± 42           | 5.3 ± 1.4 × 10 <sup>2</sup>       | 14 ± 3                  | 1.0 ± 0.2 × 10 <sup>6</sup>             |
| Spleen      | 9.3 ± 1.4         | 8.9 ± 0.1 × 10 <sup>5</sup>       | 110 ± 70          | 6.9 ± 1.5 × 10 <sup>2</sup>       | 9.3 ± 1.4               | 8.9 ± 0.8 × 10 <sup>5</sup>             |
| Kidney      | 5.0 ± 5.2         | 1.1 ± 0.3 × 10 <sup>6</sup>       | 78 ± 30           | 3.9 ± 0.6 × 10 <sup>3</sup>       | 5.0 ± 5.2               | 1.1 ± 0.3 × 10 <sup>6</sup>             |
| Blood       | 7.8 ± 1.2         | 5.0 ± 1.8 × 10 <sup>3</sup>       | 240 ± 0           | 4.8 ± 0.4 × 10 <sup>3</sup>       | 7.9 ± 1.2               | 8.7 ± 1.8 × 10 <sup>3</sup>             |
| Spinal Cord | 6.0 ± 1.9         | 2.3 ± 1.1 × 10 <sup>2</sup>       | 240 ± 20          | 4.1 ± 1.4 × 10 <sup>0</sup>       | 6.0 ± 1.9               | 2.3 ± 1.1 × 10 <sup>2</sup>             |
| Brain       | 20 ± 3            | 5.0 ± 1.4 × 10 <sup>4</sup>       | 180 ± 90          | 6.9 ± 5.2 × 10 <sup>0</sup>       | 20 ± 3                  | 5.0 ± 1.6 × 10 <sup>4</sup>             |

Figure S5: Tissue exposure to aptamer (at various time points) was estimated as the area under the fitted concentration-time curves, Equation S6. Values of  $A_T$  ( $T$  in minutes) are given in Table S7. The areas under the dashed line and gray shaded region from Figures 2-4 of the main text are shown for a sense of background.

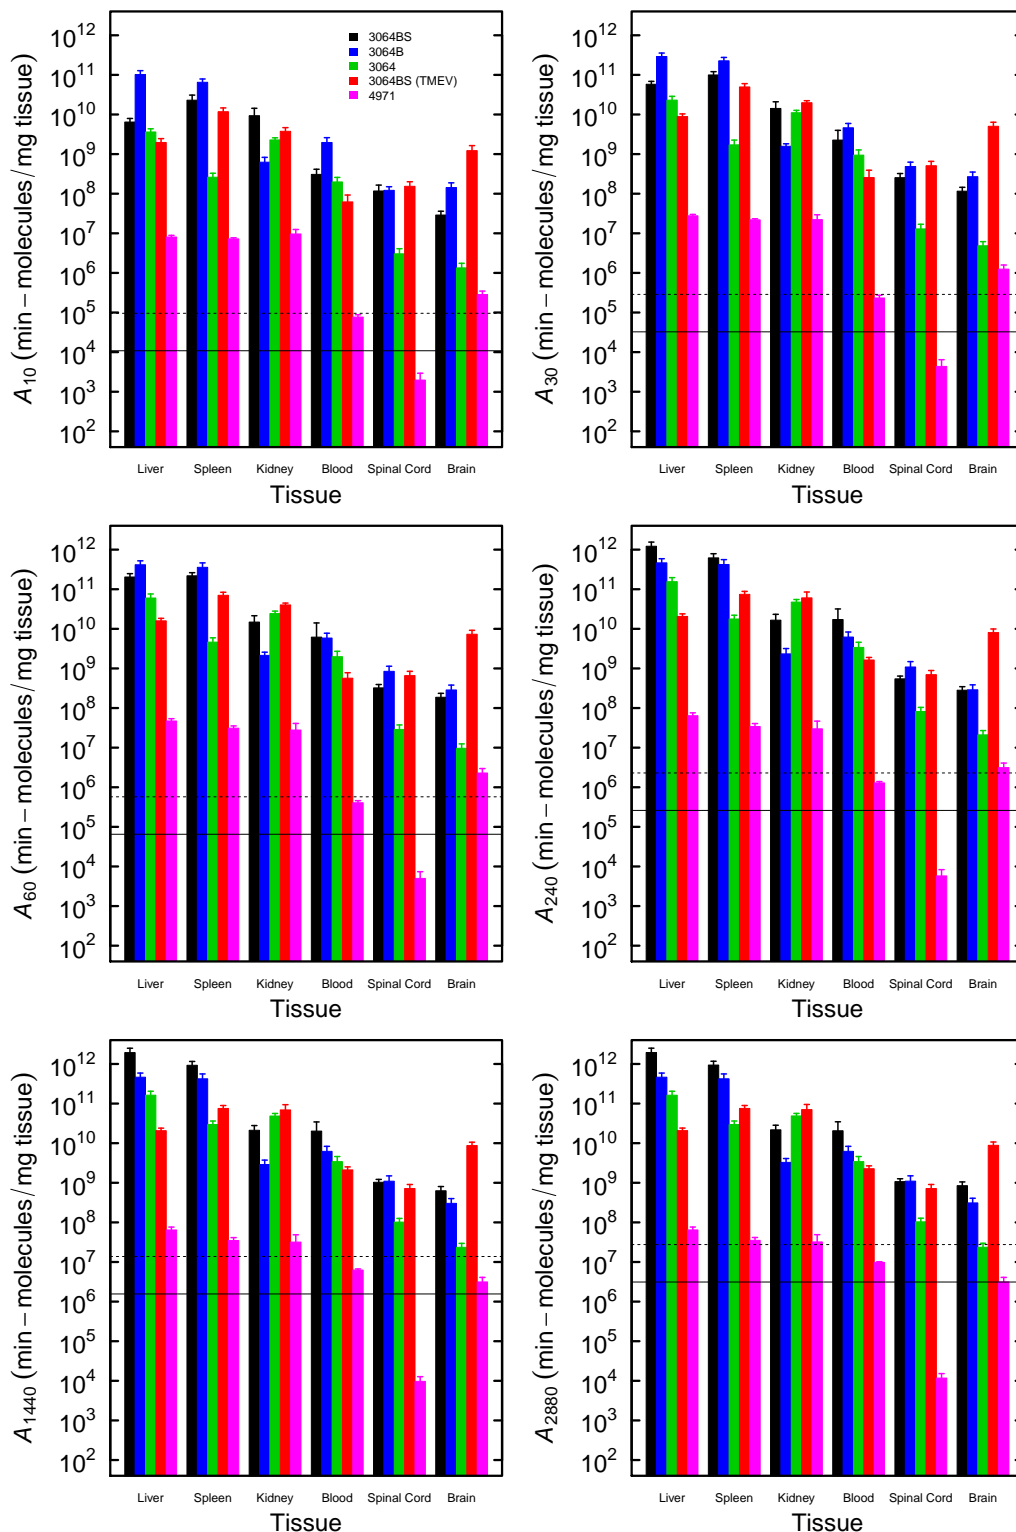

Table S7: Tissue exposure to aptamer (at various time points) was estimated as the area under the fitted concentration-time curves

| Tissue      | 10 min                       | 30 min                       | 1 hr                         | A (min-molecules/mg tissue)  |                              |                              |                              | 48 hr                        | $\infty$ |
|-------------|------------------------------|------------------------------|------------------------------|------------------------------|------------------------------|------------------------------|------------------------------|------------------------------|----------|
|             |                              |                              |                              | 4 hr                         | 24 hr                        |                              |                              |                              |          |
|             | 3064BS                       |                              |                              |                              |                              |                              |                              |                              |          |
| Liver       | $6.5 \pm 1.5 \times 10^9$    | $5.8 \pm 1.1 \times 10^{10}$ | $2.0 \pm 0.4 \times 10^{11}$ | $1.2 \pm 0.3 \times 10^{12}$ | $1.9 \pm 0.6 \times 10^{12}$ |          |
| Spleen      | $2.3 \pm 0.8 \times 10^{10}$ | $1.0 \pm 0.2 \times 10^{11}$ | $2.2 \pm 0.4 \times 10^{11}$ | $6.2 \pm 1.7 \times 10^{11}$ | $9.3 \pm 2.3 \times 10^{11}$ | $9.4 \pm 2.3 \times 10^{11}$ | $9.4 \pm 2.3 \times 10^{11}$ | $9.4 \pm 2.3 \times 10^{11}$ |          |
| Kidney      | $9.3 \pm 5.0 \times 10^9$    | $1.4 \pm 0.7 \times 10^{10}$ | $1.5 \pm 0.7 \times 10^{10}$ | $1.7 \pm 0.7 \times 10^{10}$ | $2.1 \pm 0.7 \times 10^{10}$ | $2.2 \pm 0.7 \times 10^{10}$ | $2.2 \pm 0.7 \times 10^{10}$ | $2.2 \pm 0.7 \times 10^{10}$ |          |
| Blood       | $3.1 \pm 1.1 \times 10^8$    | $2.3 \pm 1.7 \times 10^9$    | $6.2 \pm 7.9 \times 10^9$    | $1.7 \pm 1.5 \times 10^{10}$ | $2.0 \pm 1.4 \times 10^{10}$ | $2.1 \pm 1.4 \times 10^{10}$ | $2.1 \pm 1.4 \times 10^{10}$ | $2.1 \pm 1.4 \times 10^{10}$ |          |
| Spinal Cord | $1.2 \pm 0.5 \times 10^8$    | $2.5 \pm 0.7 \times 10^8$    | $3.2 \pm 0.7 \times 10^8$    | $5.5 \pm 1.0 \times 10^8$    | $1.0 \pm 0.2 \times 10^9$    | $1.1 \pm 0.2 \times 10^9$    | $1.1 \pm 0.2 \times 10^9$    | $1.1 \pm 0.2 \times 10^9$    |          |
| Brain       | $2.9 \pm 0.7 \times 10^7$    | $1.2 \pm 0.3 \times 10^8$    | $1.9 \pm 0.5 \times 10^8$    | $2.8 \pm 0.6 \times 10^8$    | $6.3 \pm 1.8 \times 10^8$    | $8.5 \pm 2.1 \times 10^8$    | $8.5 \pm 2.1 \times 10^8$    | $1.1 \pm 0.1 \times 10^9$    |          |
|             | 3064B                        |                              |                              |                              |                              |                              |                              |                              |          |
| Liver       | $1.0 \pm 0.3 \times 10^{11}$ | $2.9 \pm 0.6 \times 10^{11}$ | $4.1 \pm 1.1 \times 10^{11}$ | $4.6 \pm 1.3 \times 10^{11}$ |          |
| Spleen      | $6.5 \pm 1.4 \times 10^{10}$ | $2.3 \pm 0.5 \times 10^{11}$ | $3.6 \pm 1.0 \times 10^{11}$ | $4.2 \pm 1.4 \times 10^{11}$ |          |
| Kidney      | $6.2 \pm 2.0 \times 10^8$    | $1.6 \pm 0.2 \times 10^9$    | $2.1 \pm 0.4 \times 10^9$    | $2.3 \pm 0.8 \times 10^9$    | $2.9 \pm 0.8 \times 10^9$    | $3.3 \pm 0.8 \times 10^9$    | $3.7 \pm 0.8 \times 10^9$    | $3.7 \pm 0.8 \times 10^9$    |          |
| Blood       | $2.0 \pm 0.6 \times 10^9$    | $4.6 \pm 1.3 \times 10^9$    | $5.9 \pm 1.9 \times 10^9$    | $6.2 \pm 2.1 \times 10^9$    |          |
| Spinal Cord | $1.2 \pm 0.3 \times 10^8$    | $4.9 \pm 1.4 \times 10^8$    | $8.5 \pm 2.9 \times 10^8$    | $1.1 \pm 0.4 \times 10^9$    |          |
| Brain       | $1.4 \pm 0.5 \times 10^8$    | $2.7 \pm 0.8 \times 10^8$    | $2.9 \pm 0.9 \times 10^8$    | $2.9 \pm 1.0 \times 10^8$    | $3.0 \pm 1.0 \times 10^8$    | $3.1 \pm 1.0 \times 10^8$    | $3.2 \pm 1.0 \times 10^8$    | $3.2 \pm 1.0 \times 10^8$    |          |
|             | 3064                         |                              |                              |                              |                              |                              |                              |                              |          |
| Liver       | $3.6 \pm 0.7 \times 10^9$    | $2.3 \pm 0.6 \times 10^{10}$ | $6.0 \pm 1.6 \times 10^{10}$ | $1.6 \pm 0.4 \times 10^{11}$ |          |
| Spleen      | $2.6 \pm 0.7 \times 10^8$    | $1.7 \pm 0.5 \times 10^9$    | $4.6 \pm 1.3 \times 10^9$    | $1.8 \pm 0.4 \times 10^{10}$ | $3.0 \pm 0.7 \times 10^{10}$ |          |
| Kidney      | $2.3 \pm 0.3 \times 10^9$    | $1.1 \pm 0.2 \times 10^{10}$ | $2.4 \pm 0.4 \times 10^{10}$ | $4.7 \pm 0.8 \times 10^{10}$ | $4.9 \pm 0.8 \times 10^{10}$ |          |
| Blood       | $2.0 \pm 0.6 \times 10^8$    | $9.4 \pm 3.3 \times 10^8$    | $2.0 \pm 0.7 \times 10^9$    | $3.4 \pm 1.2 \times 10^9$    |          |
| Spinal Cord | $3.0 \pm 1.0 \times 10^6$    | $1.3 \pm 0.4 \times 10^7$    | $2.9 \pm 0.9 \times 10^7$    | $8.2 \pm 2.2 \times 10^7$    | $1.0 \pm 0.2 \times 10^8$    |          |
| Brain       | $1.3 \pm 0.4 \times 10^6$    | $4.8 \pm 1.3 \times 10^6$    | $9.6 \pm 2.8 \times 10^6$    | $2.1 \pm 0.6 \times 10^7$    | $2.4 \pm 0.6 \times 10^7$    |          |
|             | 3064BS (TMEV)                |                              |                              |                              |                              |                              |                              |                              |          |
| Liver       | $2.0 \pm 0.5 \times 10^9$    | $8.9 \pm 1.5 \times 10^9$    | $1.6 \pm 0.2 \times 10^{10}$ | $2.1 \pm 0.3 \times 10^{10}$ |          |
| Spleen      | $1.2 \pm 0.3 \times 10^{10}$ | $5.0 \pm 1.0 \times 10^{10}$ | $7.0 \pm 1.4 \times 10^{10}$ | $7.4 \pm 1.4 \times 10^{10}$ | $7.5 \pm 1.4 \times 10^{10}$ | $7.6 \pm 1.4 \times 10^{10}$ | $7.6 \pm 1.4 \times 10^{10}$ | $7.6 \pm 1.4 \times 10^{10}$ |          |
| Kidney      | $3.8 \pm 0.9 \times 10^9$    | $2.0 \pm 0.2 \times 10^{10}$ | $4.0 \pm 0.5 \times 10^{10}$ | $6.1 \pm 2.4 \times 10^{10}$ | $6.9 \pm 2.5 \times 10^{10}$ | $7.0 \pm 2.4 \times 10^{10}$ | $7.1 \pm 2.4 \times 10^{10}$ | $7.1 \pm 2.4 \times 10^{10}$ |          |
| Blood       | $6.2 \pm 3.0 \times 10^7$    | $2.6 \pm 1.4 \times 10^8$    | $5.7 \pm 2.1 \times 10^8$    | $1.6 \pm 0.3 \times 10^9$    | $2.1 \pm 0.4 \times 10^9$    | $2.3 \pm 0.4 \times 10^9$    | $2.5 \pm 0.4 \times 10^9$    | $2.5 \pm 0.4 \times 10^9$    |          |
| Spinal Cord | $1.5 \pm 0.5 \times 10^8$    | $5.1 \pm 1.5 \times 10^8$    | $6.6 \pm 1.9 \times 10^8$    | $7.0 \pm 1.9 \times 10^8$    | $7.2 \pm 1.9 \times 10^8$    |          |
| Brain       | $1.2 \pm 0.4 \times 10^9$    | $5.0 \pm 1.3 \times 10^9$    | $7.3 \pm 1.9 \times 10^9$    | $8.0 \pm 1.9 \times 10^9$    | $8.7 \pm 1.9 \times 10^9$    | $8.8 \pm 1.9 \times 10^9$    | $8.9 \pm 1.9 \times 10^9$    | $8.9 \pm 1.9 \times 10^9$    |          |
|             | 4971                         |                              |                              |                              |                              |                              |                              |                              |          |
| Liver       | $8.1 \pm 0.8 \times 10^6$    | $2.8 \pm 0.2 \times 10^7$    | $4.7 \pm 0.7 \times 10^7$    | $6.4 \pm 1.2 \times 10^7$    | $6.4 \pm 1.2 \times 10^7$    | $6.5 \pm 1.2 \times 10^7$    | $6.5 \pm 1.2 \times 10^7$    | $6.5 \pm 1.2 \times 10^7$    |          |
| Spleen      | $7.2 \pm 0.5 \times 10^6$    | $2.2 \pm 0.1 \times 10^7$    | $3.1 \pm 0.4 \times 10^7$    | $3.4 \pm 0.6 \times 10^7$    | $3.5 \pm 0.6 \times 10^7$    |          |
| Kidney      | $9.6 \pm 2.9 \times 10^6$    | $2.2 \pm 0.7 \times 10^7$    | $2.8 \pm 1.3 \times 10^7$    | $3.0 \pm 1.7 \times 10^7$    | $3.2 \pm 1.7 \times 10^7$    |          |
| Blood       | $7.7 \pm 1.1 \times 10^4$    | $2.3 \pm 0.4 \times 10^5$    | $4.1 \pm 0.5 \times 10^5$    | $1.3 \pm 0.1 \times 10^6$    | $6.3 \pm 0.4 \times 10^6$    | $9.8 \pm 0.4 \times 10^6$    | $1.3 \pm 0.3 \times 10^7$    | $1.3 \pm 0.3 \times 10^7$    |          |
| Spinal Cord | $2.0 \pm 1.0 \times 10^3$    | $4.4 \pm 2.1 \times 10^3$    | $5.0 \pm 2.4 \times 10^3$    | $5.8 \pm 2.5 \times 10^3$    | $9.7 \pm 3.0 \times 10^3$    | $1.2 \pm 0.3 \times 10^4$    | $1.3 \pm 0.4 \times 10^4$    | $1.3 \pm 0.4 \times 10^4$    |          |
| Brain       | $2.8 \pm 0.6 \times 10^5$    | $1.2 \pm 0.3 \times 10^6$    | $2.3 \pm 0.7 \times 10^6$    | $3.1 \pm 0.9 \times 10^6$    |          |
